# Supplementary material
Source: publisher site journal article supplement (https://www.dovepress.com/article/379616)
Supplement: Supplementary file 1 [file get_supplementary_file.php]

Supplementary Table S1: Maternal baseline characteristics of included (n=60) and excluded (n=156) participants of the iPROFILE study.

|  | Included*  (n=60) | Excluded**  (n=156) | *P#* |
| --- | --- | --- | --- |
| Ethnicity, n(%) |  |  | 0.65 |
| Chinese | 37 (61.7) | 93 (60.4) |  |
| Malay | 19(31.7) | 46 (29.9) |  |
| Indian | 1 (1.7) | 8 (1.7) |  |
| Others | 3(5.0) | 7 (5.0) |  |
| Education, n (%) |  |  | 0.55 |
| Secondary and below | 6 (10.9) | 12 (8.2) |  |
| College and above | 49 (89.1) | 134 (91.8) |  |
| Family history of diabetes, n(%) | 27 (45.0) | 77 (49.7) | 0.65 |
| History of GDM, n(%) | 0 (0.0) | 15 (9.68) | 0.012 |
| Parous, n(%) | 35 (58.3) | 91 (58.7) | 0.82 |
| Age (years), mean + SD | 30.6 + 3.9 | 31.6 + 4.3 | 0.14 |
| %Pre-pregnancy BMI (kg/m2), mean + SD | 24.7 + 5.9 | 24.3 + 5.7 | 0.67 |

iPROFILE, Integrating the Use of Calibration-Free Continuous Monitoring for Pregnancy Glucose Profiling; BMI, body-mass index

*Missing data for participants: education (n = 3).
**Missing data for non-participants: ethnicity (n=1), education(n=15), Family history of diabetes (n=1), parity (n=1),age (n=1), pre-pregnancy BMI (n=18).

#*p*-value across three ethnic groups were determined with the use of a χ2-analysis (categorical) or t-test (continuous). Values were presented as mean ± s.d. for continuous data or n (%) for categorical data.
*p*<0.05 is statistically significant

Supplementary Table S2: CGM parameters in the first and second trimester of pregnancy in women with and without GDM in a subset of n=49 participants.

| CGM parameters (n=49) | GDM (n=9) | Non-GDM (n=40) | *Adjusted *p* value |
| --- | --- | --- | --- |
|  | Adjusted  Median (IQR) | Adjusted  Median (IQR) |  |
|  |  |  |  |
| First trimester (9-13 weeks) |  |  |  |
| Mean glucose (mmol/L) | 4.45 (4.4-4.6) | 4.01(3.9-4.1) | 0.20 |
| J-Index | 11.4(11.3-12.1) | 8.25(7.9-8.6) | 0.09 |
| MAGE (mmol/L) | 3.28(3.2-3.3) | 2.59(2.5-2.6) | 0.02 |
| SD (mmol/L) | 1.30(1.2-1.3) | 1.01(0.9-1.0) | 0.02 |
| CV (%), adjusted mean + SD | 28.1 + 1.1 | 24.8 + 0.9 | 0.05 |
| TIR (%), adjusted mean + SD | 68.2 + 5.4 | 67.7 + 2.8 | 0.69 |
| TBR (%), adjusted mean + SD | 27.4 + 5.4 | 31.7 + 3.3 | 0.97 |
| TAR (%) | 4.37(3.8-5.2) | 0.54 (0.07-0.94) | 0.12 |
|  |  |  |  |
|  |  |  |  |
| Second trimester (18-23 weeks) |  |  |  |
| Mean glucose (mmol/L) | 4.92(4.0-5.1) | 4.08(4.0-4.2) | 0.02 |
| J-Index | 13.6(13.5-14.6) | 8.39(7.9-8.9) | 0.009 |
| MAGE (mmol/L) | 3.36(3.3-3.4) | 2.45(2.4-2.5) | <0.001 |
| SD (mmol/L) | 1.39(1.3-1.4) | 0.98(0.9-1.0) | <0.001 |
| CV (%), adjusted mean + SD | 3.37 + 0.13 | 2.45 + 0.12 | 0.01 |
| TIR (%), adjusted mean + SD | 72.5 + 6.4 | 70.2 + 3.9 | 0.74 |
| TBR (%), adjusted mean + SD | 19.5 + 7.5 | 29.3 + 3.5 | 0.35 |
| TAR (%) | 7.59(7.2-9.4) | 0.27(-0.7-1.0) | 0.07 |
|  |  |  |  |
|  |  |  |  |

Data expressed as adjusted median (IQR) unless otherwise stated. GDM, gestational diabetes mellitus; CG, control group; BMI, body mass index; CGM, continuous glucose monitoring; %CV, coefficient of `variation; SDBG, standard deviation; MAGE, Mean amplitude of glycaemic excursions; GA, gestational age; %TAR, percentage of time above target range; %TIR, percentage of time in range; %TBR, percentage of time below target range; The significance is set at *p* < 0.003. p value significance level.

* p values were adjusted for maternal pre-pregnancy BMI and ethnicity

Supplementary Table S3: CGM parameters in the first and second trimester (at two time points) of pregnancy in women with and without GDM in a subset of n=39 participants.

| CGM parameters | GDM (n=7)  Adjusted  Median (IQR) | Non-GDM (n=32)  Adjusted  Median (IQR) | *Adjusted P value |
| --- | --- | --- | --- |
|  |  |  |  |
| First trimester (9-13 weeks) |  |  |  |
| Mean glucose (mmol/L) | 4.54(4.51-4.80) | 4.05(4.1-4.2) | 0.27 |
| SD (mmol/L) | 1.33(1.22-1.33) | 1.05(0.98-1.06) | 0.06 |
| MAGE (mmol/L) | 3.34(3.11-33.5) | 2.69(2.54-2.71) | 0.07 |
| J-Index | 11.9(11.8-12.8) | 8.63(8.28-8.91) | 0.13 |
| CV (%), adjusted mean + SD | 27.6 + 5.0 | 24.9 + 4.2 | 0.15 |
|  |  |  |  |
| Second trimester (18-23 weeks) |  |  |  |
| Mean glucose, mmol/L | 5.19(5.15-5.55) | 4.14(4.02-4.25) | 0.01 |
| SD, mmol/L | 1.44(1.28-1.45) | 1.03(0.95-1.05) | 0.003 |
| MAGE, mmol/L | 3.42(3.39-3.50) | 2.58(2.42-2.62) | 0.006 |
| J-Index | 15.1(14.9-17.4) | 8.65(8.16-9.01) | 0.009 |
| CV%, adjusted mean + SD | 26.7 + 2.8 | 24.2 + 1.8 | 0.14 |
|  |  |  |  |
| Second trimester (24-28 weeks) |  |  |  |
| Mean glucose, mmol/L | 5.39(5.32-6.03) | 4.20(4.06-4.38) | 0.16 |
| SD, mmol/L | 1.40(1.31-1.41) | 1.03(0.94-1.05) | 0.04 |
| MAGE, mmol/L | 3.63(3.51-3.67) | 2.55(2.26-2.61) | 0.01 |
| J-Index | 18.0(17.6-21.2) | 8.91(7.92-9.64) | 0.12 |
| CV%, adjusted mean + SD | 24.9 + 2.6 | 23.6 + 1.3 | 0.12 |

Data was expressed as adjusted median (IQR) unless otherwise stated. GDM, gestational diabetes mellitus; BMI, body mass index; CGM, continuous glucose monitoring; %CV, coefficient of variation; SD, standard deviation; MAGE, Mean amplitude of glycaemic excursions; GA, gestational age; %TAR, percentage of time above target range; %TIR, percentage of time in range; %TBR, percentage of time below target range; The p value significance level is set at *p* < 0.003.

* p values were adjusted for maternal pre-pregnancy BMI and ethnicity

First trimester: 9-13 weeks (First clinic visit)

Second trimester:18-23 weeks (Second clinic visit)

24-31 weeks (Third clinic visit)

OGTT at 24-28 weeks

No GDM

GDM

Third trimester: 32-33 weeks (Fourth clinic visit)

:34-37 weeks (Fifth clinic visit)

Third trimester: 32-33 weeks (Fourth clinic visit)

Postnatal: 6-12 weeks (Sixth clinic visit)

Supplementary Figure S1. Clinic visit flow chart for all participants

mmol/L

mmol/L

Supplementary Figure S2: Trend in glycaemic variability parameters SD and MAGE across the three trimesters of pregnancy at (9-13 weeks’ gestation, 18-23 weeks’ gestation and 24-31 weeks’ gestation) by patients who were diagnosed with GDM and patients who were not in a subset of n=39 participants. MAGE, mean amplitude of glycemic excursions; SD, standard deviation
